# Supplementary material for: Moisture-resistant and highly efficient narrow-band red-emitting fluoride phosphor K2NaGaF6:Mn4+ for warm white LED application
Source: Royal Society of Chemistry journal article supplement (doi:10.1039/c9tc02445j), 2019-01-01
Supplement: c9tc02445j1.pdf [file c9tc02445j1.pdf]

## Supporting Information

### Moisture-resistant and highly efficient narrow-band red-emitting fluoride phosphor $\text{K}_2\text{NaGaF}_6:\text{Mn}^{4+}$ for warm white LED application

Jun Gao,<sup>ab</sup> Haomiao Zhu,<sup>abc\*</sup> Renfu Li,<sup>b</sup> Decai Huang,<sup>b</sup> Benlong Luo,<sup>b</sup> Wenwu You,<sup>b</sup> Jianxi Ke,<sup>b</sup> Xiaodong Yi,<sup>b</sup> Xiaoying Shang,<sup>b</sup> Jin Xu,<sup>b</sup> Zhonghua Deng,<sup>b</sup> Li Xu,<sup>b</sup> Wang Guo,<sup>b</sup> and Xueyuan Chen<sup>ab\*</sup>

<sup>a</sup> College of Chemistry, Fuzhou University, Fuzhou, Fujian 350108, China.

<sup>b</sup> CAS Key Laboratory of Design and Assembly of Functional Nanostructures, and Fujian Key Laboratory of Nanomaterials, Fujian Institute of Research on the Structure of Matter, Chinese Academy of Sciences, Fuzhou, Fujian 350002, China.

<sup>c</sup> Xiamen Institute of Rare Earth Materials, Haixi Institute, Chinese Academy of Sciences, Xiamen, Fujian 361021, China.

\* E-mail: zhm@fjirsm.ac.cn; xchen@fjirsm.ac.cn

**Table S1** Selected bond lengths (Å) for K<sub>2</sub>NaGaF<sub>6</sub>.<sup>a</sup>

| Atoms         | Distances   | Atoms         | Distances   |
|---------------|-------------|---------------|-------------|
| Ga(1)-F(1)#1  | 1.885(3)    | K(1)-F(1)#17  | 2.90755(19) |
| Ga(1)-F(1)#2  | 1.885(3)    | K(1)-F(1)#8   | 2.90755(19) |
| Ga(1)-F(1)    | 1.885(3)    | K(1)-F(1)#9   | 2.90755(19) |
| Ga(1)-F(1)#3  | 1.885(3)    | K(1)-Na(1)#13 | 3.55508(13) |
| Ga(1)-F(1)#4  | 1.885(3)    | Na(1)-F(1)#18 | 2.220(3)    |
| Ga(1)-F(1)#5  | 1.885(3)    | Na(1)-F(1)#17 | 2.220(3)    |
| Ga(1)-K(1)#5  | 3.55508(13) | Na(1)-F(1)    | 2.220(3)    |
| Ga(1)-K(1)#6  | 3.55508(13) | Na(1)-F(1)#15 | 2.220(3)    |
| Ga(1)-K(1)#7  | 3.55508(13) | Na(1)-F(1)#19 | 2.220(3)    |
| Ga(1)-K(1)#8  | 3.55508(13) | Na(1)-F(1)#20 | 2.220(3)    |
| Ga(1)-K(1)#9  | 3.55508(13) | Na(1)-K(1)#21 | 3.55508(13) |
| Ga(1)-K(1)#10 | 3.55508(13) | Na(1)-K(1)#22 | 3.55508(13) |
| K(1)-F(1)#1   | 2.90755(19) | Na(1)-K(1)#23 | 3.55508(13) |
| K(1)-F(1)#4   | 2.90755(19) | Na(1)-K(1)#8  | 3.55508(13) |
| K(1)-F(1)#11  | 2.90755(18) | Na(1)-K(1)#20 | 3.55508(13) |
| K(1)-F(1)#12  | 2.90755(19) | Na(1)-K(1)#24 | 3.55508(13) |
| K(1)-F(1)#13  | 2.90755(19) | F(1)-K(1)#21  | 2.90755(18) |
| K(1)-F(1)#14  | 2.90755(18) | F(1)-K(1)#9   | 2.90755(18) |
| K(1)-F(1)#15  | 2.90755(18) | F(1)-K(1)#8   | 2.90755(18) |
| K(1)-F(1)#16  | 2.90755(19) |               |             |

<sup>a</sup> Symmetry transformations used to generate equivalent atoms: (#1)  $y-1/2, z, x+1/2$ ; (#2)  $-y+1/2, -z+1, -x+1/2$ ; (#3)  $-z+1/2, -x+1/2, -y+1$ ; (#4)  $z-1/2, x+1/2, y$ ; (#5)  $-x, -y+1, -z+1$ ; (#6)  $x, y-1/2, z-1/2$  (#7)  $-x+1/2, -y+1, -z+3/2$ ; (#8)  $-x+1/2, -y+3/2, -z+1$ ; (#9)  $-x, -y+3/2, -z+3/2$  (#10)  $x-1/2, y-1/2, z$ ; (#11)  $y-1/2, z+1/2, x+1$ ; (#12)  $z, x+1, y$ ; (#13)  $x+1/2, y, z+1/2$ ; (#14)  $-y+1, -z+1, -x+1$ ; (#15)  $-z+1/2, -x+1, -y+3/2$ ; (#16)  $-z+1, -x+1/2, -y+3/2$ ; (#17)  $-y+1, -z+3/2, -x+1/2$ ; (#18)  $y-1, z+1/2, x+1/2$ ; (#19)  $z-1/2, x+1, y-1/2$ ; (#20)  $-x, -y+2, -z+1$ ; (#21)  $x-1/2, y, z-1/2$ ; (#22)  $-x+1/2, -y+2, -z+3/2$ ; (#23)  $x, y+1/2, z-1/2$ ; (#24)  $x-1/2, y+1/2, z$ .

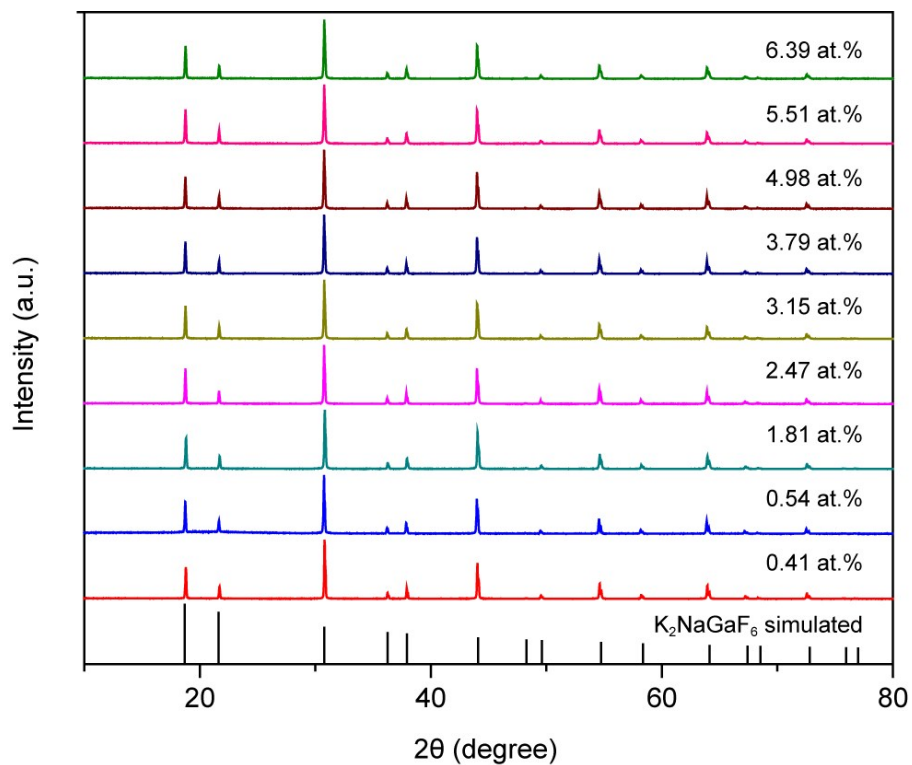

**Figure S1** X-ray diffraction (XRD) patterns of  $K_2NaGaF_6:Mn^{4+}$  red phosphors with various  $Mn^{4+}$  concentrations. All the patterns match well with the simulated XRD pattern derived from single crystal diffraction data of  $K_2NaGaF_6$  crystal.

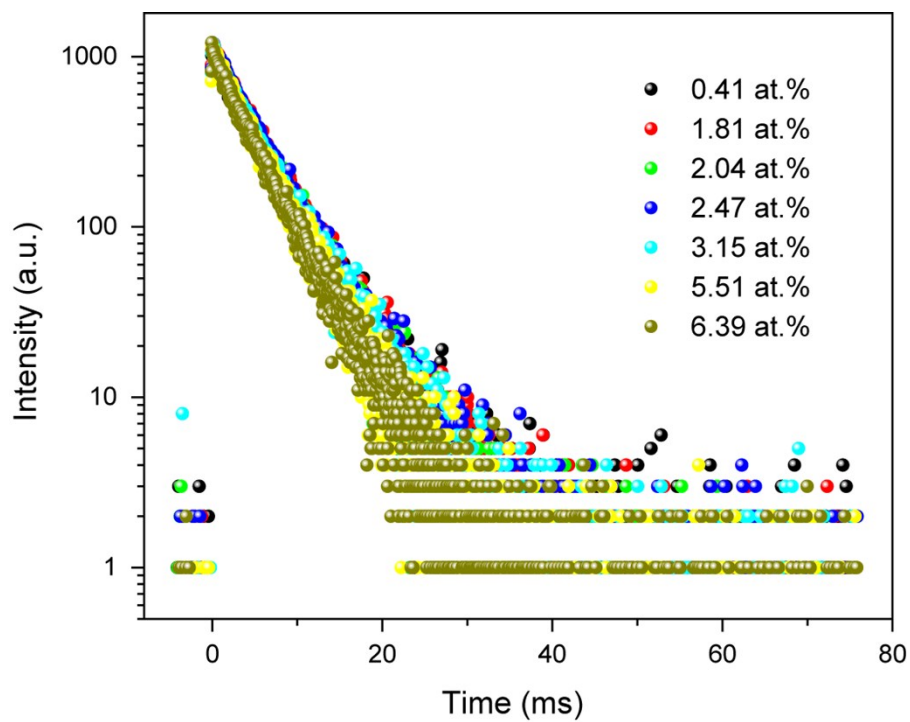

**Figure S2** Photoluminescence (PL) decay curves from <sup>2</sup>E energy state of Mn<sup>4+</sup> ions in K<sub>2</sub>NaGaF<sub>6</sub>:Mn<sup>4+</sup> samples with various Mn<sup>4+</sup> concentrations by monitoring 631 nm emission at room temperature (RT).

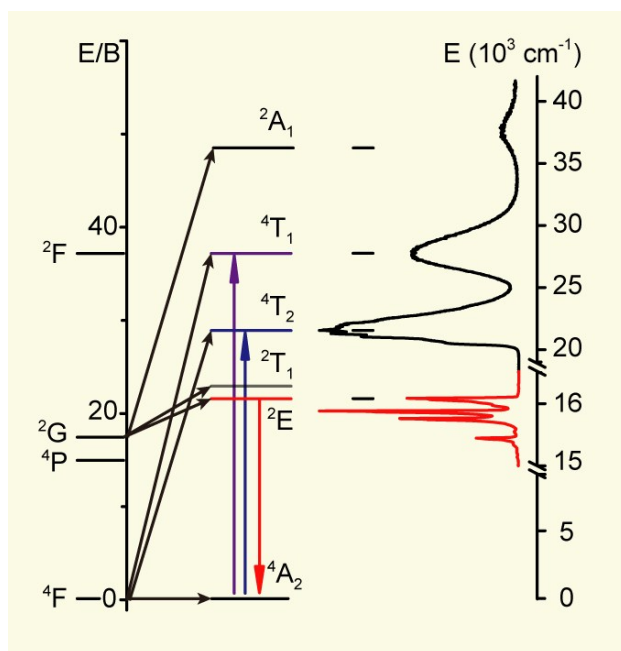

**Figure S3** Excitation and emission spectra of the  $\text{K}_2\text{NaGaF}_6:\text{Mn}^{4+}$  (0.54 at.%) sample measured at 10 K.

## Supplementary Discussion

The values of  $D_q$ ,  $B$  and  $C$  can be calculated based on experimentally measured excitation and emission spectra, according to the following equations<sup>1-2</sup>:

$$E(^4T_2 - ^4A_2) = 10D_q \quad (1)$$

$$\frac{B}{D_q} = \frac{(\Delta E/D_q)^2 - 10(\Delta E/D_q)}{15(\Delta E/D_q - 8)} \quad (2)$$

$$E(^2E - ^4A_2) = 9B + 3C - 90B^2/(10D_q) \quad (3)$$

Where  $\Delta E = E(^4T_1(^4F)) - E(^4T_2)$ .

The energies of  $^4T_1$ ,  $^4T_2$  and  $^2E$  were experimentally determined to be 27778  $\text{cm}^{-1}$ , 21580  $\text{cm}^{-1}$  and 16088  $\text{cm}^{-1}$ , respectively. From equations (1)-(3), the value of  $D_q$ ,  $B$ , and  $C$  were calculated to be 2158  $\text{cm}^{-1}$ , 574  $\text{cm}^{-1}$  and 4099  $\text{cm}^{-1}$ , respectively.

$$E(^2T_1 - ^2E) = 66B^2/(10D_q) = 1008 \text{ cm}^{-1} \quad (4)$$

$$E(^2A_1 - ^4A_2) = 10D_q + 4B + 3C = 36173 \text{ cm}^{-1} \quad (5)$$

From equations (4)-(5), the value of  $^2T_1$ ,  $^2A_1$  were calculated to be 17096  $\text{cm}^{-1}$ , and 36173  $\text{cm}^{-1}$ , respectively.

## Supplementary References

- 1 B. Henderson and G. F. Imbusch, Optical spectroscopy of inorganic solids, Oxford University Press, Great Clarendon Street, Oxford, 2006.
- 2 M. J. Reisfeld, N. A. Matwiyoff and L. B. Asprey, J. Mol. Spectrosc., 1971, 39, 8-20.
